# Supplementary material for: MicroRNA-101 reverses temozolomide resistance by inhibition of GSK3β in glioblastoma
Source: PubMed Central journal article supplement (PMC5346737; doi:10.18632/oncotarget.12861), 2016-10-25
Supplement: oncotarget-07-79584-s001.pdf [file oncotarget-07-79584-s001.pdf]

# MicroRNA-101 reverses temozolomide resistance by inhibition of GSK3 $\beta$ in glioblastoma

## SUPPLEMENTARY FIGURES

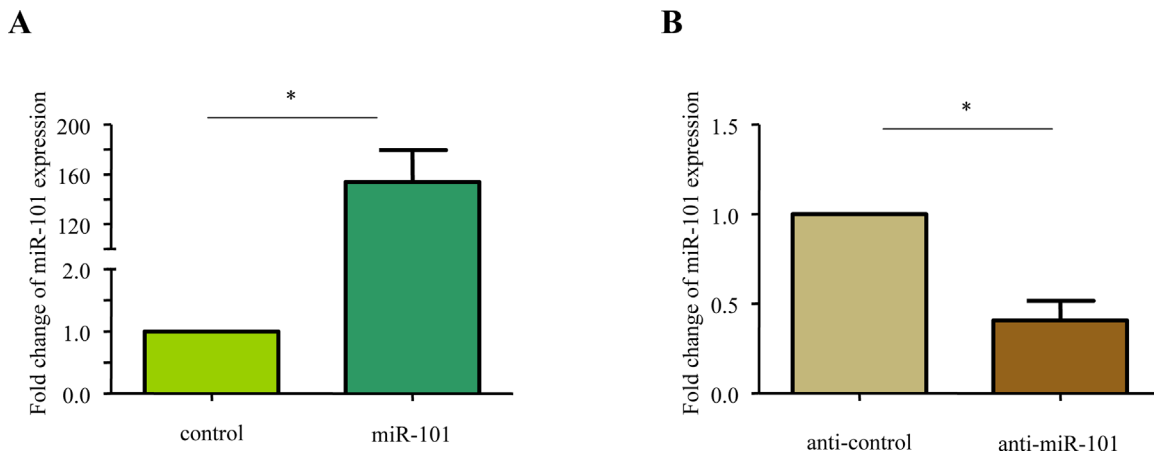

**Supplementary Figure S1: The relative expression of miR-101 in A172 cells either over-expression of miRNA-101 A. or downregulation by anti-miR-101 B.**

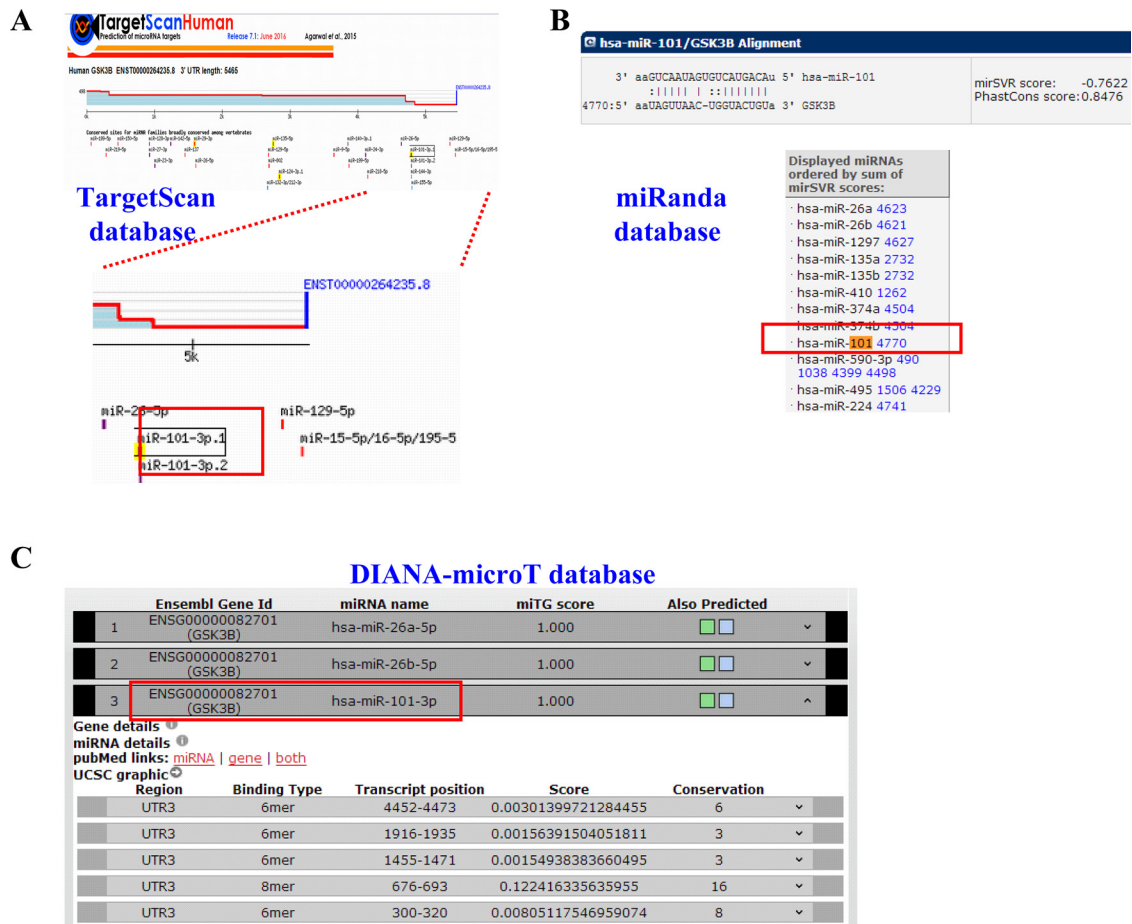

Supplementary Figure S2: In silico analysis used by the publicly available databases TargetScan A, miRanda B, and DIANA-microT C, showed that GSK3β was the potential target gene of miR-101.

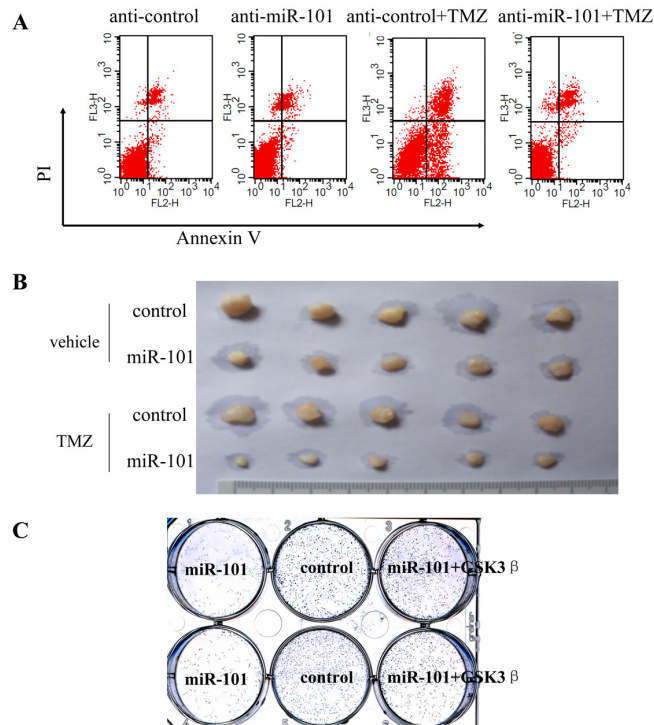

**Supplementary Figure S3:** **A.** The percentage of cell death of A172 cells transfected with anti-miR-101 or control in the presence or absence of TMZ. **B.** Tumor xenografts generated in mice four weeks after inoculation. **C.** The colony formation assay of A172-TR cells transduced with miR-101 and GSK3 $\beta$  upon the treatment of TMZ (200  $\mu$ M).
